# Supplementary material for: Non-Energy-Restricted Low-Carbohydrate Diet Combined with Exercise Intervention Improved Cardiometabolic Health in Overweight Chinese Females
Source: PubMed Central journal article supplement (PMC6950598; doi:10.3390/nu11123051), 2019-12-13
Supplement: nutrients-11-03051-s001.pdf [file nutrients-11-03051-s001.pdf]

**Table S1.** Dietary energy intake and nutrient compositions before and during intervention.

|                                   | Pre_Week1       | Pre_Week2       | Week1               | Week2               | Week3               | Week4               |
|-----------------------------------|-----------------|-----------------|---------------------|---------------------|---------------------|---------------------|
| Energy intake (kcal)              |                 |                 |                     |                     |                     |                     |
| CON                               |                 |                 | 2074 (606.1)        | 2017 (433.4)        | 1951 (708.0)        | 2018 (309.4)        |
| LC-HIIT                           | 2195<br>(730.1) | 2225<br>(428.0) | 1794 (238.0)        | 1874 (276.3)        | 1926 (436.2)        | 1855 (487.3)        |
| LC-MICT                           | 2157<br>(399.1) | 1990<br>(519.2) | 2124 (469.0)        | 2047 (517.1)        | 2013 (528.2)        | 1927 (425.1)        |
| LC-CON                            | 1799<br>(424.5) | 1931<br>(362.6) | 1820 (458.2)        | 1680 (505.0)        | 1787 (393.9)        | 1790 (288.6)        |
| Carbohydrate (% of energy intake) |                 |                 |                     |                     |                     |                     |
| CON                               |                 |                 | 42.5 (9.2) *^&      | 43.8 (10.2) *^&     | 42.6 (9.0) *^&      | 43.2 (10.8) *^&     |
| LC-HIIT                           | 48.7 (7.7)      | 45.8 (9.8)      | 14.2 (8.8)          | 10.3 (5.8)          | 9.7 (5.8)           | 7.6 (3.0)           |
| LC-MICT                           | 45.1 (9.2)      | 46.1 (10.3)     | 12.7 (8.1)          | 11.1 (5.9)          | 8.8 (3.0)           | 8.5 (3.2)           |
| LC-CON                            | 43.3 (9.0)      | 45.6 (12.6)     | 10.4 (6.0)          | 8.8 (6.9)           | 8.8 (5.4)           | 9.0 (8.6)           |
| Fat (% of energy intake)          |                 |                 |                     |                     |                     |                     |
| CON                               |                 |                 | 42.2 (6.0) *^&      | 40.0 (7.0) *^&      | 40.8 (7.6) *^&      | 37.5 (9.6) *^       |
| LC-HIIT                           | 35.4 (6.9)      | 36.7 (7.5)      | 62.3 (9.5)          | 65.3 (9.0)          | 68.6 (7.6)          | 68.5 (10.2)         |
| LC-MICT                           | 36.8 (8.9)      | 34.9 (8.6)      | 63.8 (8.4)          | 64.4 (7.0)          | 68.2 (6.0)          | 68.8 (7.6)          |
| LC-CON                            | 39.9 (8.2)      | 37.9 (9.7)      | 67.6 (8.0)          | 67.2 (7.1)          | 68.3 (5.1)          | 69.4 (8.9)          |
| Protein (% of energy intake)      |                 |                 |                     |                     |                     |                     |
| CON                               |                 |                 | 16.3 (4.7) *^&      | 15.5 (3.6) *^&      | 15.9 (4.0) *^&      | 15.9 (4.9) *^&      |
| LC-HIIT                           | 14.7 (2.1)      | 15.2 (2.9)      | 23.6 (5.2)          | 24.5 (7.4)          | 21.7 (4.3)          | 23.7 (8.1)          |
| LC-MICT                           | 14.1 (2.7)      | 15.1 (2.6)      | 23.4 (5.1)          | 24.6 (4.6)          | 23.1 (5.1)          | 22.9 (5.5)          |
| LC-CON                            | 15.5 (4.0)      | 15.4 (4.9)      | 22.1 (5.1)          | 24.0 (4.6)          | 23.4 (5.7)          | 21.8 (4.8)          |
| Carbohydrate (in g)               |                 |                 |                     |                     |                     |                     |
| CON                               |                 |                 | 223.0 (86.1)<br>*^& | 221.4 (68.0)<br>*^& | 209.9 (99.1)<br>*^& | 216.9 (58.3)<br>*^& |
| LC-HIIT                           | 265.9 (96.2)    | 255.5 (71.7)    | 62.6 (39.0)         | 48.4 (27.8)         | 49.0 (36.0)         | 35.7 (17.1)         |
| LC-MICT                           | 240.8 (58.1)    | 232.2 (86.3)    | 68.4 (46.0)         | 55.1 (29.5)         | 43.3 (14.8)         | 40.8 (18.5)         |
| LC-CON                            | 196.1 (67.2)    | 214.8 (53.9)    | 47.7 (30.6)         | 36.5 (27.2)         | 38.7 (23.8)         | 40.2 (20.2)         |
| Fat (in g)                        |                 |                 |                     |                     |                     |                     |
| CON                               |                 |                 | 96.6 (28.5) *^&     | 89.5 (23.1) *^&     | 87.1 (29.9) *^&     | 84.7 (27.0) *^&     |
| LC-HIIT                           | 87.0 (36.6)     | 90.5 (24.3)     | 124.4 (25.9)        | 135.7 (26.5)        | 145.9 (35.0)        | 139.9 (37.5)        |
| LC-MICT                           | 89.2 (31.1)     | 75.5 (21.2)     | 151.1 (41.6)        | 146.8 (39.8)        | 153.2 (43.7)        | 146.5 (30.5)        |
| LC-CON                            | 78.2 (18.6)     | 83.4 (31.8)     | 137.4 (41.5)        | 126.1 (41.9)        | 136.5 (36.8)        | 138.0 (30.0)        |
| Protein (in g)                    |                 |                 |                     |                     |                     |                     |
| CON                               |                 |                 | 82.3 (25.6) *^      | 77.9 (22.3) *^      | 78.0 (31.7) *^&     | 79.9 (23.6) *^      |
| LC-HIIT                           | 81.3 (29.7)     | 84.1 (21.7)     | 106.3 (29.4)        | 115.4 (30.1)        | 103.9 (25.9)        | 112.04 (28.0)       |
| LC-MICT                           | 75.6 (19.0)     | 74.5 (21.9)     | 121.8 (29.2)        | 126.6 (33.7)        | 115.8 (38.4)        | 112.1 (34.8)        |
| LC-CON                            | 71.6 (29.6)     | 74.3 (25.8)     | 98.8 (27.6)         | 99.6 (33.0)         | 102.8 (27.8)        | 97.6 (25.8)         |

Outcome variables are presented as means (standard deviations). CON: control group, LC-CON: low-carbohydrate diet control group, LC-HIIT: low-carbohydrate diet combined with high-intensity interval training, LC-MICT: low-carbohydrate diet combined with moderate-intensity continuous training. \*  $p < 0.05$  compared to LC-HIIT, ^  $p < 0.05$  compared to LC-MICT, &  $p < 0.05$  compared to LC-CON.

**Table 2.** Daily physical activities before and during intervention.

| <b>Steps</b> | <b>CON</b>  | <b>LC-HIIT</b> | <b>LC-MICT</b> | <b>LC-CON</b> |
|--------------|-------------|----------------|----------------|---------------|
| pre_week1    |             | 7838 (3282)    | 8182 (2548)    | 8852 (1846)   |
| pre_week2    |             | 7779 (2648)    | 8028 (1401)    | 7822 (1952)   |
| week1        | 7770 (3083) | 8400 (1775)    | 9317 (1780)    | 8029 (2012)   |
| week2        | 7559 (3187) | 8341 (2162)    | 9297 (2323)    | 8312 (3061)   |
| week3        | 8867 (2165) | 9156 (1793)    | 8461 (1934)    | 7694 (2978)   |
| week4        | 8038 (2174) | 8147 (2092)    | 8422 (2331)    | 7483 (1725)   |

Outcome variables are presented as means (standard deviations). CON: control group, LC-CON: low-carbohydrate diet control group, LC-HIIT: low-carbohydrate diet combined with high-intensity interval training, LC-MICT: low-carbohydrate diet combined with moderate-intensity continuous training.
